# Supplementary material for: Cataloging Coding Sequence Variations in Human Genome Databases
Source: PLoS One. 2008 Oct 30;3(10):e3575. doi: 10.1371/journal.pone.0003575 (PMC2570488; doi:10.1371/journal.pone.0003575)
Supplement: Table S4 — (0.03 MB XLS) [file pone.0003575.s006.xls]

## Sheet: Table S4
Table S4. Chemical distances and relative frequencies among amino acid substitutions
Reference residue	Amino acid group	Variant residue	Amino acid group	Chemical distance from Grantham's matrix	Relative frequency of AAS in [S-C] to in [M-C]	Relative frequency of AAS in [M-C] to in [S-C]
Leu	G1	Ile	G1	5	3.08	0.324675
Ile	G1	Leu	G1	5	3.04	0.328947
Leu	G1	Met	G1	15	4.13	0.242131
Tyr	G2	Phe	G2	22	4.56	0.219298
Phe	G2	Tyr	G2	22	3.14	0.318471
Gln	G3	His	G4	24	3.69	0.271003
Ile	G1	Val	G1	29	4.41	0.226757
Val	G1	Ile	G1	29	4.05	0.246914
Ser	G3	Gly	G1	56	3.67	0.27248
Thr	G3	Ser	G3	58	7.01	0.142653
Ser	G3	Thr	G3	58	4.04	0.247525
Thr	G3	Ala	G1	58	3.26	0.306748
Ala	G1	Gly	G1	60	3.3	0.30303
Met	G1	Arg	G4	91	0.294118	3.4
Ser	G3	Ala	G1	99	5.8	0.172414
Ala	G1	Ser	G3	99	3.38	0.295858
Ile	G1	Lys	G4	102	0.207039	4.83
Leu	G1	Arg	G4	102	0.229885	4.35
Val	G1	Asp	G5	152	0.238095	4.2
Cys	G3	Arg	G4	180	0.19084	5.24
Cys	G3	Tyr	G2	194	0.101626	9.84
Cys	G3	Phe	G2	205	0.249377	4.01
Cys	G3	Trp	G2	215	0.315457	3.17
Relative frequency means the observed frequency in one group divided by the observed frequency in the other group.
